# Supplementary material for: Carbon quantum dots derived from the extracellular polymeric substance of anaerobic ammonium oxidation granular sludge for detection of trace Mn(vii) and Cr(vi)
Source: Royal Society of Chemistry journal article supplement (doi:10.1039/d0ra06133f), 2020-01-01
Supplement: d0ra06133f1.pdf [file d0ra06133f1.pdf]

Supporting material

**Carbon Quantum Dots Derived from Extracellular Polymeric Substance of Anaerobic Ammonium Oxidation Granular Sludge for Detection of Trace Mn(VII) and Cr(VI)**

Fengli Liu <sup>a</sup>, Huosheng Li <sup>b,\*</sup>, Dandan Liao <sup>c</sup>, Yanhong Xu <sup>d</sup>, Mingxia Yu <sup>c</sup>, Shengwen Deng <sup>b</sup>,  
Gaosheng Zhang <sup>b</sup>, Tangfu Xiao <sup>c</sup>, Jianyou Long <sup>c</sup>, Hongguo Zhang <sup>c</sup>, Yuting Li <sup>a</sup>, Keke Li <sup>c</sup>,

Ping Zhang <sup>a,\*</sup>

*<sup>a</sup> Key Laboratory for Water Quality and Conservation of the Pearl River Delta, Ministry of Education, College of Chemistry and Chemical Engineering, Guangzhou University, Guangzhou 510006, China*

*<sup>b</sup> Institute of Environmental Research at Greater Bay Area, Guangzhou University, Guangzhou 510006, China*

*<sup>c</sup> School of Environmental Science and Engineering, Guangzhou University, Guangzhou 510006, China*

*<sup>d</sup> Key Laboratory of Three Gorges Reservoir Region's Eco-Environments of MOE, Chongqing University, Chongqing 400045, China*

**\* Corresponding authors:**

**Email:** hilihuo@163.com (H. Li)

zhangping@gzhu.edu.cn (P. Zhang)

**Phone:** +86 020 39366505

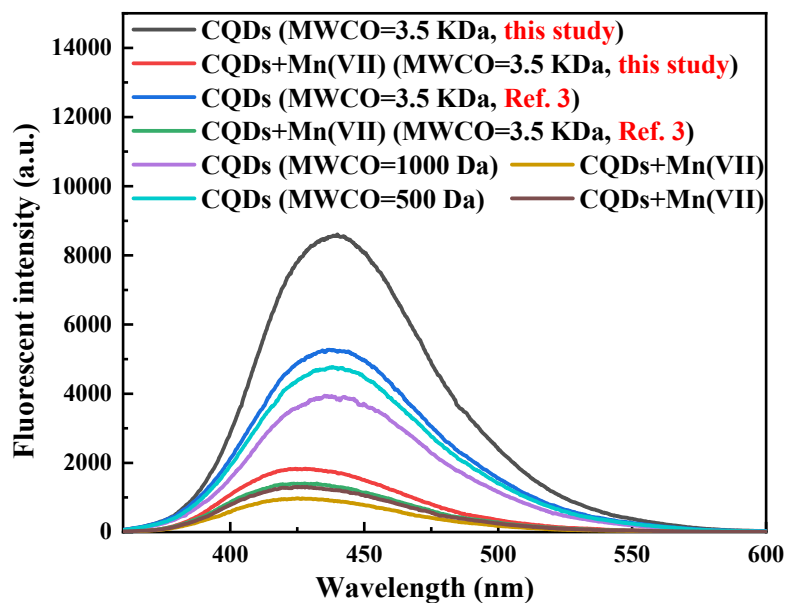

**Fig.S1.** Fluorescence spectra of different CQDs and their respective products obtained after reactions with Mn(VII) in the PBS buffer solution (pH=7,  $\text{NaH}_2\text{PO}_4\text{-Na}_2\text{HPO}_4$ ).

Supporting material

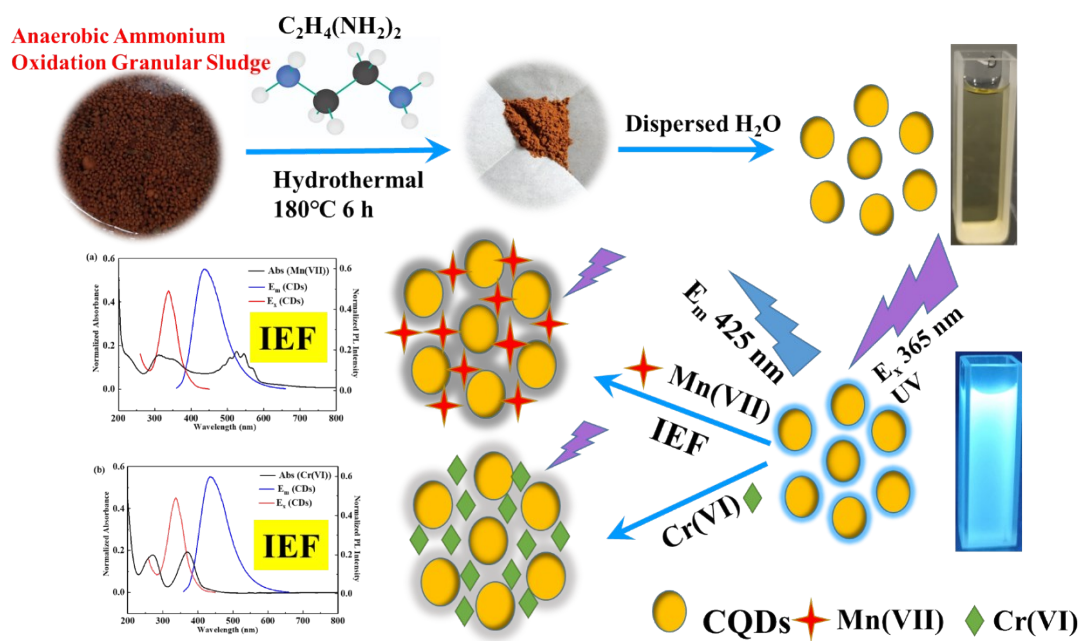

**Fig. S2.** The schematic flow chart of the preparation method for the synthesis of the carbon quantum dots with the extracellular polymer substances from granular sludge of anaerobic ammonium oxidation.

## Supporting material

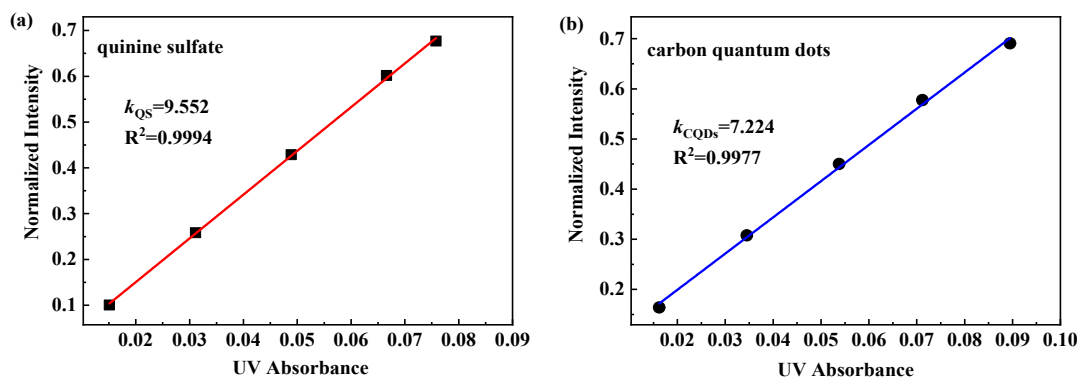

**Fig. S3.** The normalized intensity as a function of the UV-Vis absorbance with: (a) quinine sulfate as a reference and (b) the carbon quantum dots as target.

## Supporting material

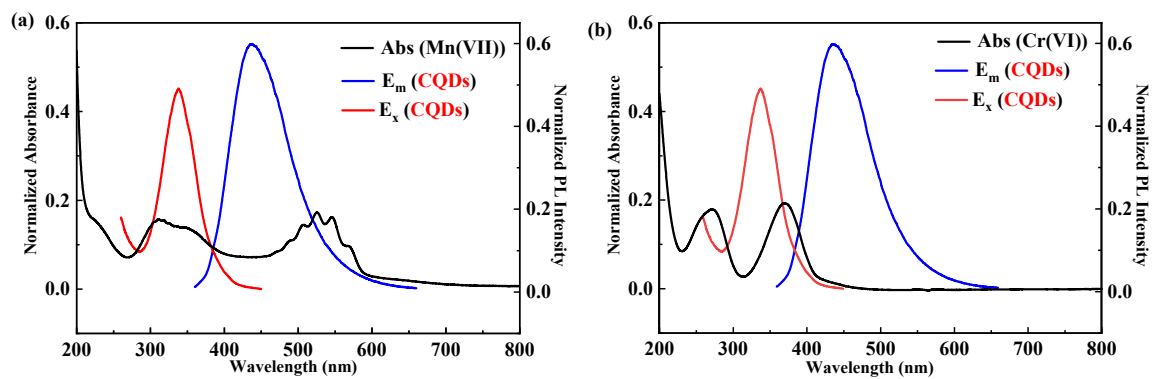

**Fig. S4.** The normalized UV-Vis absorbance curve and the photoluminescence curve for the excitation and emission of the carbon quantum dots or the Mn(VII) solution.

Supporting material

**Table. S1.** The total organic carbon of the EPS extract.

| Samples                    | TOC (mg/mL)      | TC (mg/mL)       | IC (mg/mL)       |
|----------------------------|------------------|------------------|------------------|
| 1                          | 697.9            | 716.6            | 18.66            |
| 2                          | 693.5            | 710.5            | 19.53            |
| 3                          | 688.0            | 708.0            | 19.94            |
| Mean $\pm$ SD <sup>a</sup> | 693.1 $\pm$ 4.96 | 711.7 $\pm$ 4.42 | 19.38 $\pm$ 0.65 |

<sup>a</sup>: Standard deviation.
